# Supplementary material for: Near-infrared turn-on fluorescent probe for discriminative detection of Cys and application in in vivo imaging
Source: Royal Society of Chemistry journal article supplement (doi:10.1039/c9ra08555f), 2019-01-01
Supplement: c9ra08555f1.pdf [file c9ra08555f1.pdf]

## Supporting Information

### Near-infrared turn-on fluorescent probe for discriminative detection of Cys and application in vivo imaging

Shaolong Qi,<sup>a†</sup> Lubao Zhu,<sup>b†</sup> Xinyu Wang,<sup>a</sup> Jianshi Du,<sup>\*a</sup> Qingbiao Yang,<sup>\*b</sup> and Yaoxian Li<sup>b</sup>

<sup>a</sup> China-Japan Union Hospital of Jilin University, Key Laboratory of Lymphatic Surgery Jilin Province, Engineering Laboratory of Lymphatic Surgery Jilin Province, Changchun 130031, P. R. China

<sup>b</sup> College of Chemistry, Jilin University, Changchun, 130021, China

† These two authors equally contribute to this paper

| Table of Contents                                                                                                                                                                                                                       |
|-----------------------------------------------------------------------------------------------------------------------------------------------------------------------------------------------------------------------------------------|
| Fig. S1 Absorption of NIRHA in the presence of 4.8 eq Cys, 480 eq GSH and 48 eq other interfering substance.                                                                                                                            |
| Fig. S2 Fluorescence of NIRHA in the presence of various interfering substance: 480 eq GSH and 48 eq other competitive substance. Fluorescence of NIRHA in the presence of 4.8 eq Cys, 480 eq GSH and 48 eq other competitive analytes. |
| Fig. S3 Cell viability of NIRHA via the standard MTT assay of HeLa cells.                                                                                                                                                               |
| Fig. S4 fluorescence signal of compound 2.                                                                                                                                                                                              |
| Fig. S5 HR-MS spectrum of released compound 2.                                                                                                                                                                                          |
| Fig. S6 HR-MS spectrum of released seven-membered ring compound.                                                                                                                                                                        |
| Fig. S7 HR-MS spectrum of probe NIRHA.                                                                                                                                                                                                  |
| Fig. S8 <sup>1</sup> H NMR of probe NIRHA.                                                                                                                                                                                              |
| Fig. S9 <sup>13</sup> C NMR of probe NIRHA.                                                                                                                                                                                             |
| Fig. S10 <sup>1</sup> H NMR of compound 2.                                                                                                                                                                                              |
| Fig. S11 HR-MS spectrum of compound 2.                                                                                                                                                                                                  |
| Table S1 Comparison of the representative Cys probes with the present work <sup>1-7</sup> .                                                                                                                                             |
| References                                                                                                                                                                                                                              |

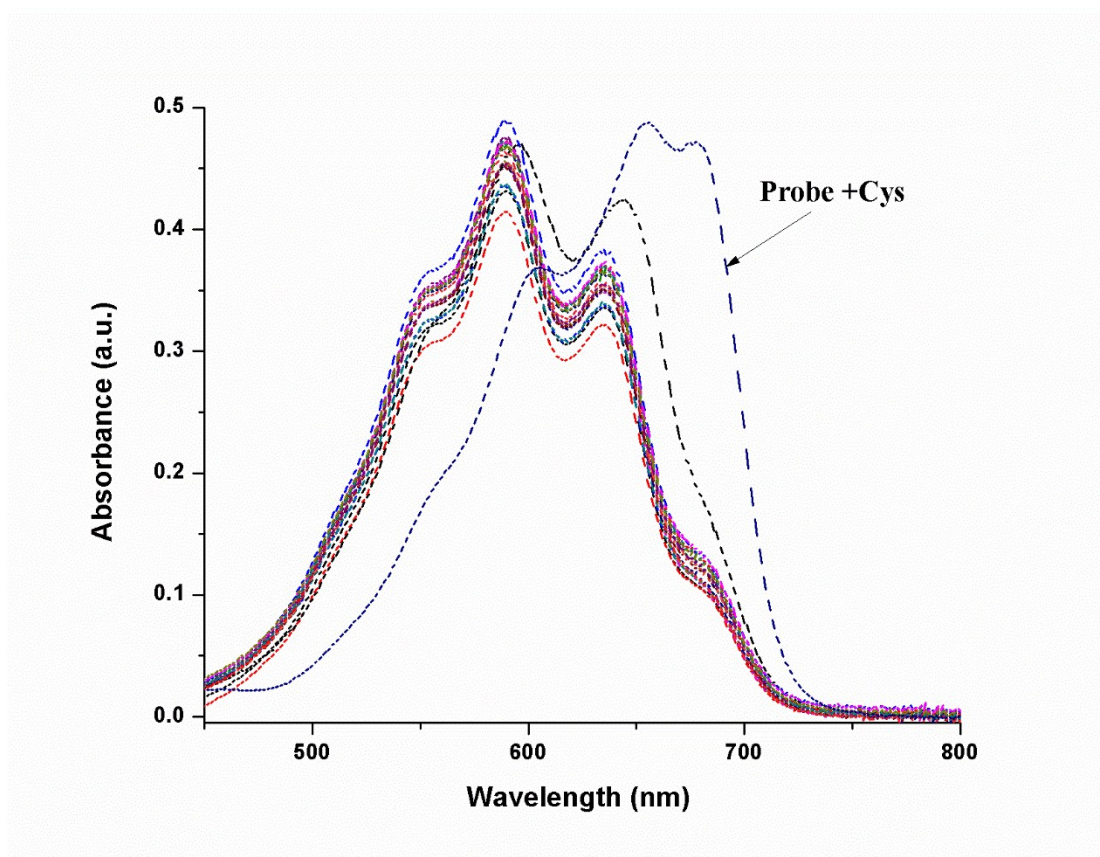

Fig. S1 Absorption of NIRHA in the presence of 4.8 eq Cys, 480 eq GSH and 48 eq other interfering substance.

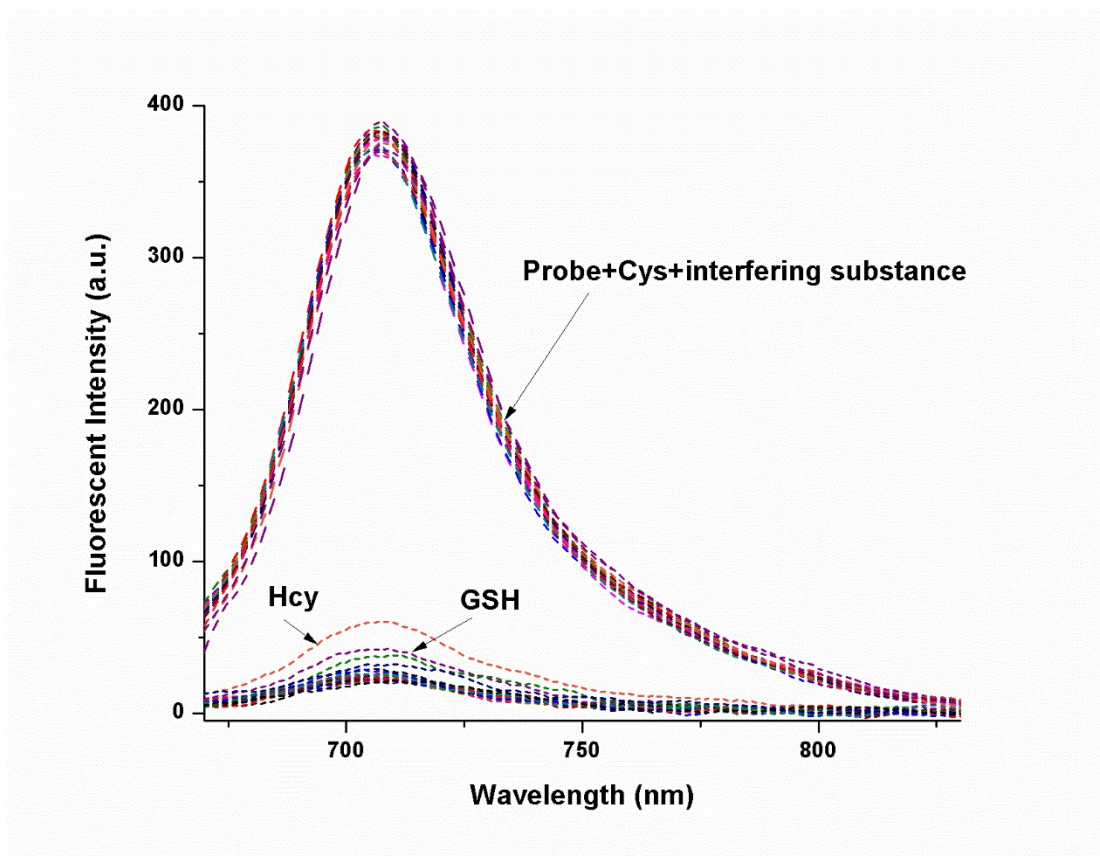

Fig. S2 Fluorescence of NIRHA in the presence of various interfering substance: 480 eq GSH and 48 eq other

competitive substance. Fluorescence of NIRHA in the presence of 4.8 eq Cys, 480 eq GSH and 48 eq other competitive analytes.

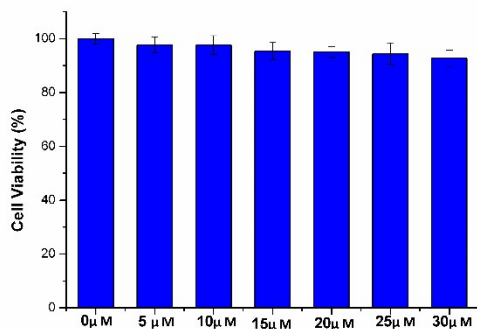

Fig. S3 Cell viability of NIRHA via the standard MTT assay of HeLa cells.

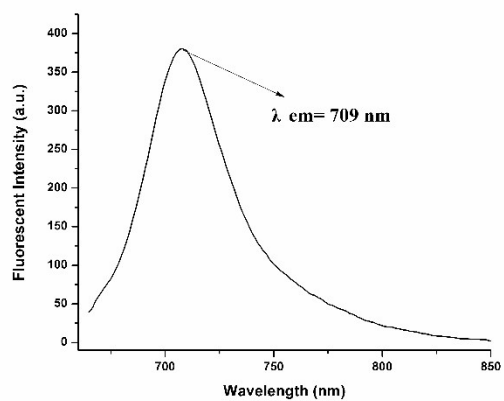

Fig. S4 fluorescence signal of compound 2.

## Mass Spectrum SmartFormula Report

### Analysis Info

Analysis Name C:\Users\ÇàÄê\Desktop\°ëë×±Éá±iÖ+ÉÖ¶\·Ó|Ö@°óμÄ·Ö×ÓÁ¿ÖÉÆ×-»úÁiÑÐ¾¿  
 Method lc-ms-hr-low.m  
 Sample Name zlb2  
 Comment  
 Acquisition Date 2019/5/28 15:16:49  
 Operator zlwei  
 Instrument / Ser# microTOF-Q II 10351

### Acquisition Parameter

Source Type ESI Ion Polarity Positive Set Nebulizer 0.4 Bar  
 Focus Active Set Capillary 4500 V Set Dry Heater 200 °C  
 Scan Begin 50 m/z Set End Plate Offset -500 V Set Dry Gas 5.0 l/min  
 Scan End 1200 m/z Set Collision Cell RF 100.0 Vpp Set Divert Valve Waste

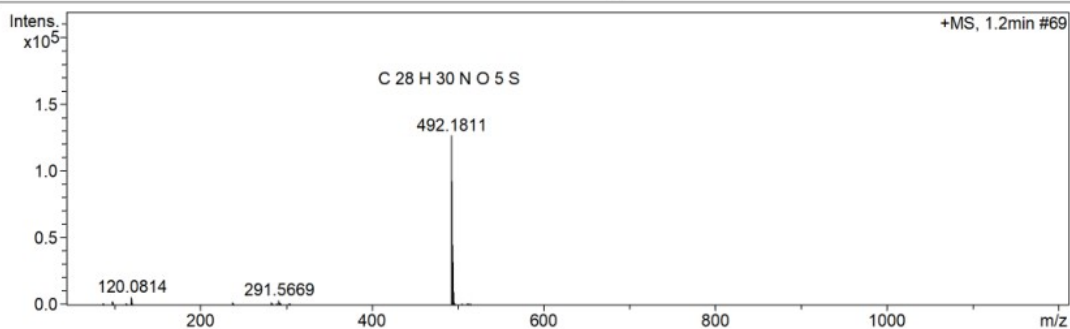

| Meas. m/z | # | Formula                                           | m/z      | err [ppm] | Mean err [ppm] | rdb  | N-Rule | ei% Conf | mSigma | Std I  | Std Mean m/z | Std I VarNorm | Std m/z Diff | Std Comb Dev |
|-----------|---|---------------------------------------------------|----------|-----------|----------------|------|--------|----------|--------|--------|--------------|---------------|--------------|--------------|
| 492.1811  | 1 | C <sub>28</sub> H <sub>30</sub> NO <sub>5</sub> S | 492.1839 | 5.6       | 5.1            | 14.5 | ok     | even     | 21.15  | 0.0322 | 0.0029       | 0.0106        | 0.0036       | 0.8427       |

Fig. S5 HR-MS spectrum of released compound 2.

## Mass Spectrum SmartFormula Report

### Analysis Info

Analysis Name C:\Users\ÇàÄê\Desktop\°ëë×±Éá±iÖ+ÉÖ¶\·Ó|Ö@°óμÄ·Ö×ÓÁ¿ÖÉÆ×-»úÁiÑÐ¾¿  
 Method lc-ms-hr-low.m  
 Sample Name zlb2  
 Comment  
 Acquisition Date 2019/5/28 15:16:49  
 Operator zlwei  
 Instrument / Ser# microTOF-Q II 10351

### Acquisition Parameter

Source Type ESI Ion Polarity Positive Set Nebulizer 0.4 Bar  
 Focus Active Set Capillary 4500 V Set Dry Heater 200 °C  
 Scan Begin 50 m/z Set End Plate Offset -500 V Set Dry Gas 5.0 l/min  
 Scan End 1200 m/z Set Collision Cell RF 100.0 Vpp Set Divert Valve Waste

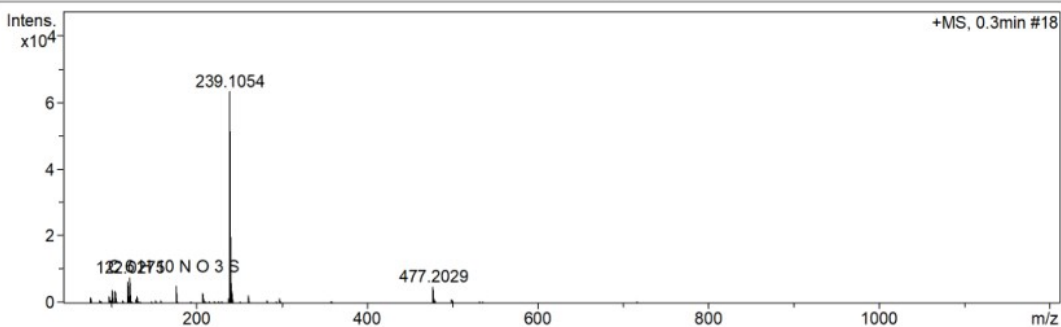

| Meas. m/z | # | Formula                                          | m/z      | err [ppm] | Mean err [ppm] | rdb | N-Rule | ei% Conf | mSigma | Std I  | Std Mean m/z | Std I VarNorm | Std m/z Diff | Std Comb Dev |
|-----------|---|--------------------------------------------------|----------|-----------|----------------|-----|--------|----------|--------|--------|--------------|---------------|--------------|--------------|
| 176.0375  | 1 | C <sub>6</sub> H <sub>10</sub> NO <sub>3</sub> S | 176.0376 | 0.3       | 2.6            | 2.5 | ok     | even     | 31.28  | 0.0514 | 0.0014       | 0.0349        | 0.0049       | 0.8427       |

Fig. S6 HR-MS spectrum of released seven-membered ring compound.

# Mass Spectrum SmartFormula Report

## Analysis Info

Analysis Name C:\Users\Administrator.USER-20150311RQ\Desktop\ZLB\_P1-F-1\_01\_11110.d  
 Method lc-ms-hr-low.m  
 Sample Name ZLB  
 Comment

Acquisition Date 2019/3/26 15:21:28  
 Operator zlwei  
 Instrument / Ser# micrOTOF-Q II 10351

## Acquisition Parameter

|             |          |                       |           |                  |           |
|-------------|----------|-----------------------|-----------|------------------|-----------|
| Source Type | ESI      | Ion Polarity          | Positive  | Set Nebulizer    | 0.4 Bar   |
| Focus       | Active   | Set Capillary         | 4500 V    | Set Dry Heater   | 200 °C    |
| Scan Begin  | 50 m/z   | Set End Plate Offset  | -500 V    | Set Dry Gas      | 5.0 l/min |
| Scan End    | 1200 m/z | Set Collision Cell RF | 100.0 Vpp | Set Divert Valve | Waste     |

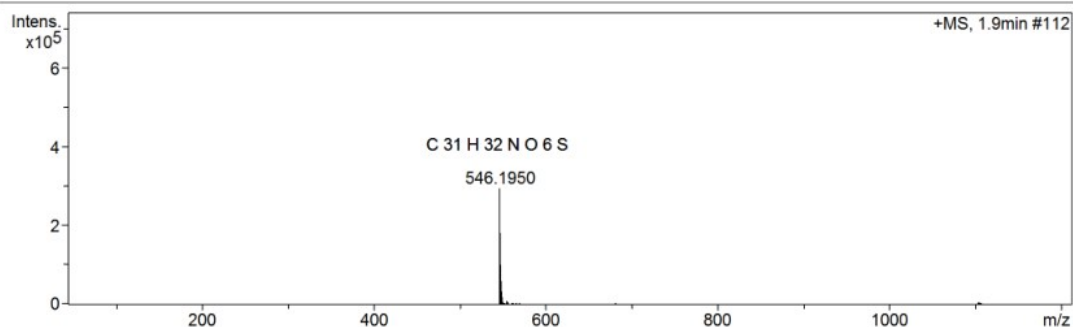

| Meas. # | m/z      | Formula                                                         | m/z      | err [ppm] | Mean err [ppm] | rdb  | N-Rule | e <sub>i</sub> Conf | mSig | Std I  | Std Mean m/z | Std I VarN | Std I m/z Diff | Std I Com Dev |
|---------|----------|-----------------------------------------------------------------|----------|-----------|----------------|------|--------|---------------------|------|--------|--------------|------------|----------------|---------------|
| 1       | 546.1950 | C <sub>31</sub> H <sub>32</sub> N <sub>6</sub> O <sub>6</sub> S | 546.1945 | -1.0      | -0.3           | 16.5 | ok     | even                | 5.88 | 0.0090 | 0.0014       | 0.0030     | 0.0032         | 0.8427        |

Fig. S7 HR-MS spectrum of probe NIRHA.

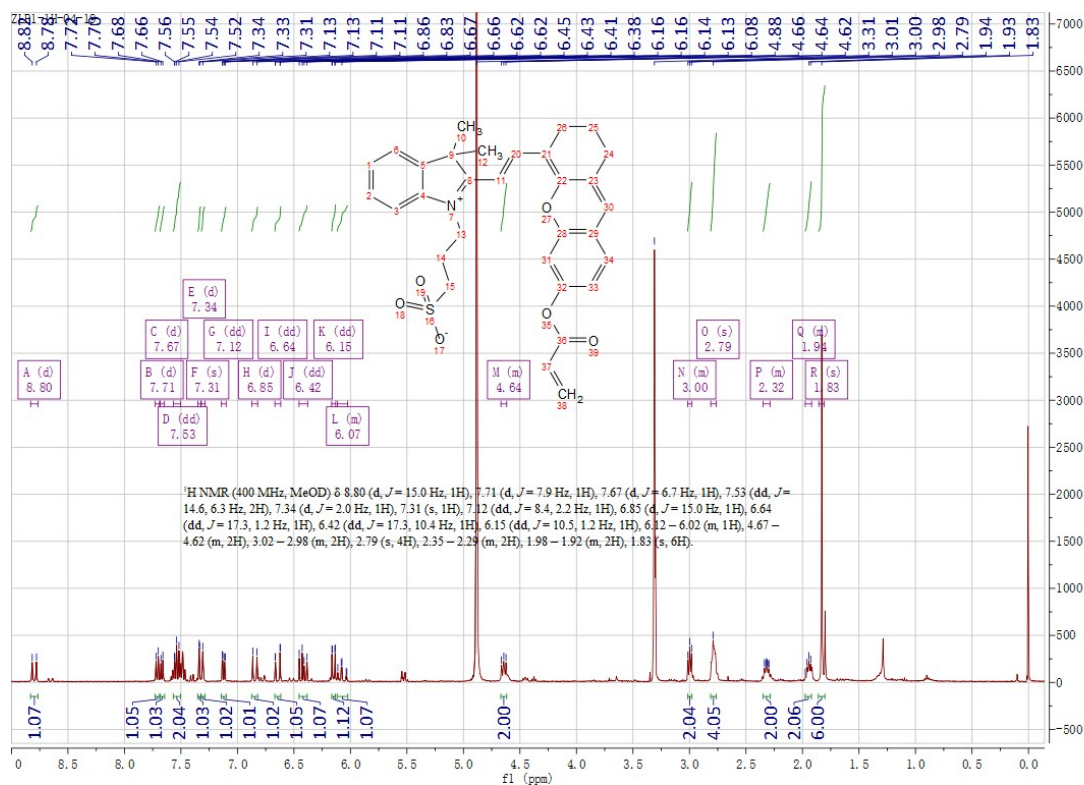

Fig. S8 <sup>1</sup>H NMR of probe NIRHA.

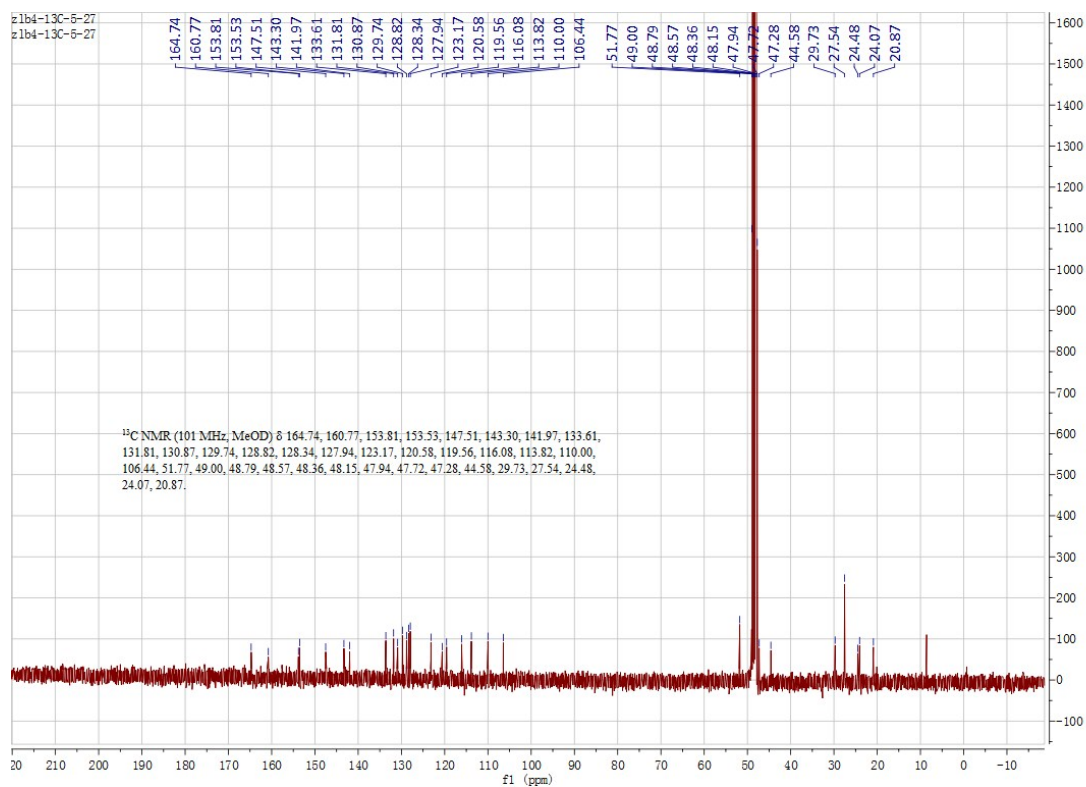

Fig. S9 <sup>13</sup>C NMR of probe NIRHA.

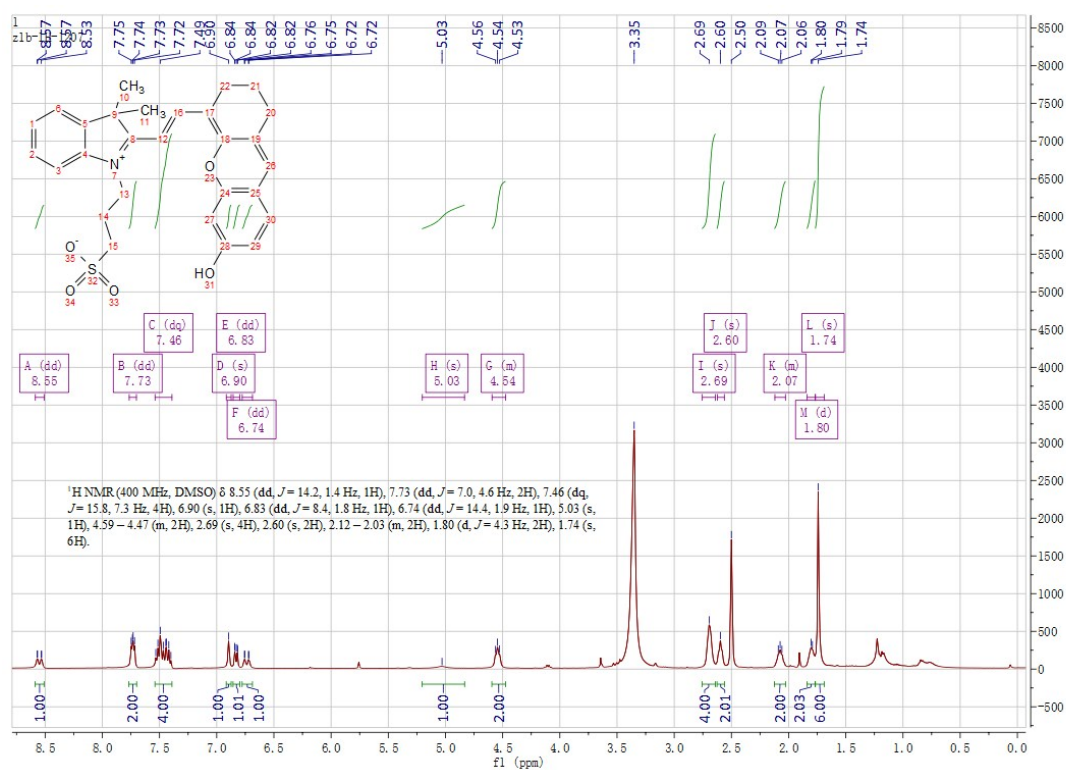

Fig. S10 <sup>1</sup>H NMR of compound 2.

## Mass Spectrum SmartFormula Report

|                      |                                                                     |                   |                     |
|----------------------|---------------------------------------------------------------------|-------------------|---------------------|
| <b>Analysis Info</b> |                                                                     | Acquisition Date  | 2018/12/5 11:28:02  |
| Analysis Name        | C:\Users\Administrator.USER-20150311RQ\Desktop\LQ4_P1-F-4_01_9730.d | Operator          | zlwei               |
| Method               | lc-ms-hr-low.m                                                      | Instrument / Ser# | micrOTOF-Q II 10351 |
| Sample Name          | LQ4                                                                 |                   |                     |
| Comment              |                                                                     |                   |                     |

|                              |          |                       |           |                  |           |
|------------------------------|----------|-----------------------|-----------|------------------|-----------|
| <b>Acquisition Parameter</b> |          |                       |           |                  |           |
| Source Type                  | ESI      | Ion Polarity          | Positive  | Set Nebulizer    | 0.4 Bar   |
| Focus                        | Active   | Set Capillary         | 4500 V    | Set Dry Heater   | 200 °C    |
| Scan Begin                   | 50 m/z   | Set End Plate Offset  | -500 V    | Set Dry Gas      | 5.0 l/min |
| Scan End                     | 1200 m/z | Set Collision Cell RF | 100.0 Vpp | Set Divert Valve | Waste     |

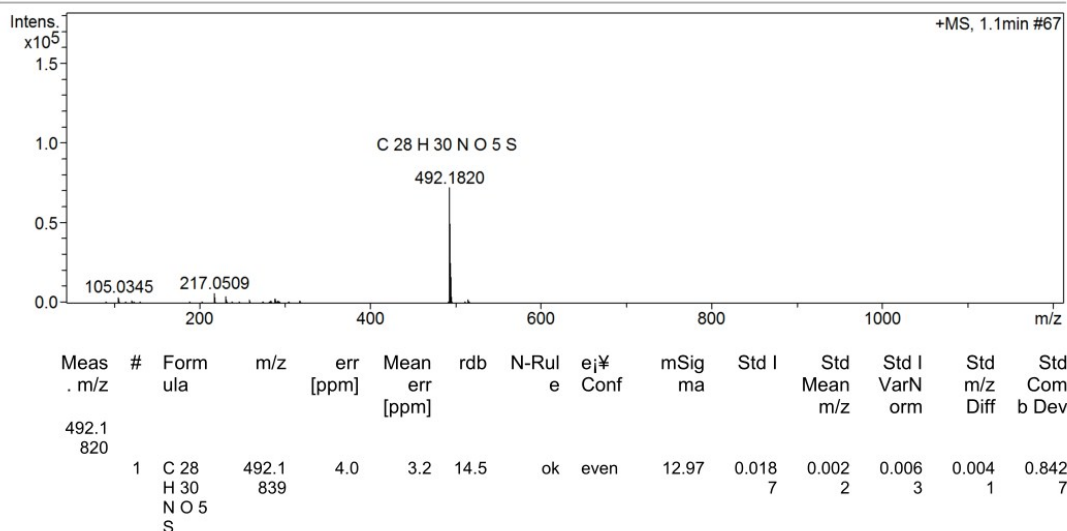

Fig. S11 HR-MS spectrum of compound 2

**Table S1.** Comparison of the representative Cys probes with the present work<sup>1-7</sup>.

| Previous literatures                                                           | Solvent system                              | LOD            | time   | $\lambda_{ex}/\lambda_{em}$ |
|--------------------------------------------------------------------------------|---------------------------------------------|----------------|--------|-----------------------------|
| <i>Angewandte Chemie International Edition</i> , 2011, <b>50</b> , 10690-10693 | PBS                                         | 0.13 $\mu$ M   | 10 min | 470/585 nm                  |
| <i>Chemical Communications</i> , 2012, <b>48</b> , 8341-8343                   | EtOH/PBS = 2:8                              | 0.11 $\mu$ M   | 9 min  | 304/ 487 nm                 |
| <i>Sensors and Actuators B: Chemical</i> , 2019, <b>290</b> , 47-52            | C <sub>2</sub> H <sub>5</sub> OH/PBS = 1:99 | 0.12 $\mu$ M   | 30 min | 570/615 nm                  |
| <i>Analytical Chemistry</i> , 2015, <b>87</b> , 4856-4863                      | DMSO/H <sub>2</sub> O = 1:19                | 0.16 $\mu$ M   | 5 min  | 670 /697 nm                 |
| <i>RSC Advances</i> , 2017, <b>7</b> , 18867-18873                             | CAN/ HEPES = 2:8                            | 0.158 $\mu$ M  | 90 min | 470/565 nm                  |
| <i>Sensors and Actuators B: Chemical</i> , 2018, <b>267</b> , 76-82            | PBS/DMSO = 4/1                              | 0.122 $\mu$ M  | 5 min  | 445/500 nm                  |
| <i>Sensors and Actuators B: Chemical</i> , 2019, <b>298</b> , 126844           | H <sub>2</sub> O/CH <sub>3</sub> CN = 3/1   | 2.31 $\mu$ M   | 10 min | 370/464 nm                  |
| This work                                                                      | PBS/DMF =99:1                               | 0.0776 $\mu$ M | 15 min | 650/710 nm                  |

**References:**

1. X. Yang, Y. Guo and R. M. Strongin, *Angewandte Chemie International Edition*, 2011, **50**, 10690-10693.
2. H. Wang, G. Zhou, H. Gai and X. Chen, *Chemical Communications*, 2012, **48**, 8341-8343.
3. S. Jiao, X. He, L. Xu, P. Ma, C. Liu, Y. Huang, Y. Sun, X. Wang and D. Song, *Sensors and Actuators B: Chemical*, 2019, **290**, 47-52.
4. J. Zhang, J. Wang, J. Liu, L. Ning, X. Zhu, B. Yu, X. Liu, X. Yao and H. Zhang, *Analytical Chemistry*, 2015, **87**, 4856-4863.
5. J. Guo, Z. Kuai, Z. Zhang, Q. Yang, Y. Shan and Y. Li, *RSC Advances*, 2017, **7**, 18867-18873.
6. X. Xie, C. Yin, Y. Yue and F. Huo, *Sensors and Actuators B: Chemical*, 2018, **267**, 76-82.
7. J. Chao, M. Li, Y. Liu, Y. Zhang, F. Huo and C. Yin, *Sensors and Actuators B: Chemical*, 2019, **298**, 126844.
